# Supplementary material for: Usability and Preliminary Effectiveness of a Preoperative mHealth App for People Undergoing Major Surgery: Pilot Randomized Controlled Trial
Source: PubMed Central journal article supplement (PMC7819776; doi:10.2196/23402), 2021-01-07
Supplement: mhealth_v9i1e23402_app1.pdf [file mhealth_v9i1e23402_app1.pdf]

## Appendix I: Overview of app content

| Timeline | Topic                      | General description                                                                                                                                                                                                                                                                                                                                                                                       | Medium |
|----------|----------------------------|-----------------------------------------------------------------------------------------------------------------------------------------------------------------------------------------------------------------------------------------------------------------------------------------------------------------------------------------------------------------------------------------------------------|--------|
|          |                            | Surgery is like running a marathon                                                                                                                                                                                                                                                                                                                                                                        |        |
|          |                            | Risk behaviour screening questions <ul style="list-style-type: none"> <li>▪ currently smoking</li> <li>▪ <math>\geq 1</math> alcohol consumption daily</li> <li>▪ <math>&lt; 30</math> min moderate-intensity physical activity daily</li> <li>▪ <math>&lt; 2</math> days a week muscle- strengthening activities</li> <li>▪ <math>\geq 3</math>kg unintentional weight loss in the last month</li> </ul> |        |
|          |                            | Patient experience with prehabilitation                                                                                                                                                                                                                                                                                                                                                                   |        |
|          |                            | Benefits of muscle strengthening before major surgery                                                                                                                                                                                                                                                                                                                                                     |        |
|          |                            | Benefits of protein-rich food before major surgery                                                                                                                                                                                                                                                                                                                                                        |        |
|          |                            | Benefits of smoking cessation                                                                                                                                                                                                                                                                                                                                                                             |        |
|          |                            | Motivation                                                                                                                                                                                                                                                                                                                                                                                                |        |
|          |                            | How to increase your physical activity                                                                                                                                                                                                                                                                                                                                                                    |        |
|          |                            | Social support                                                                                                                                                                                                                                                                                                                                                                                            |        |
|          |                            | Benefits of alcohol cessation                                                                                                                                                                                                                                                                                                                                                                             |        |
|          |                            | Effects of alcohol on anesthesia                                                                                                                                                                                                                                                                                                                                                                          |        |
|          |                            | Benefits of prehabilitation                                                                                                                                                                                                                                                                                                                                                                               |        |
|          |                            | Stair climbing                                                                                                                                                                                                                                                                                                                                                                                            |        |
|          |                            | Benefits of combining exercise with protein-rich food.                                                                                                                                                                                                                                                                                                                                                    |        |
|          |                            | Examples of protein rich food                                                                                                                                                                                                                                                                                                                                                                             |        |
|          |                            | The benefits of physical activity                                                                                                                                                                                                                                                                                                                                                                         |        |
|          |                            | Are you physically active for 30 minutes a day?                                                                                                                                                                                                                                                                                                                                                           |        |
|          |                            | Smoking and taste                                                                                                                                                                                                                                                                                                                                                                                         |        |
|          |                            | Smoking cessation support                                                                                                                                                                                                                                                                                                                                                                                 |        |
|          |                            | When to consult a dietician                                                                                                                                                                                                                                                                                                                                                                               |        |
|          | Alcohol cessation support. |                                                                                                                                                                                                                                                                                                                                                                                                           |        |
|          | When and what to eat       |                                                                                                                                                                                                                                                                                                                                                                                                           |        |
|          | How to exercise            |                                                                                                                                                                                                                                                                                                                                                                                                           |        |

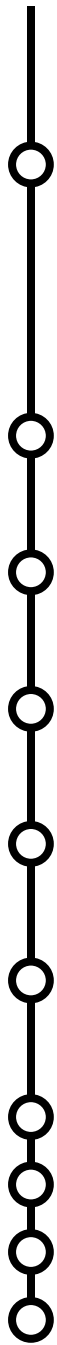

- 
Do you exercise daily?




- 
Do you eat protein-rich food?



- 
Withdrawal symptoms


- Complications and smoking


- Have you quit smoking?




- 
When to consult a physical therapist


- 
Protein rich food


- 
Did you reduce your alcohol intake?




- 
Combining exercise with protein intake


- Do you exercise daily?




- 
Smoking cessation tips



- 
Social support


- 
How much protein do you need?



- 
Alcohol before surgery



- 
General advice on medication before surgery


- 
General advice on preoperative fasting


- 
Physical activity after surgery



- 
General breathing exercises



- SURGERY**
- 
Physical activity during hospitalization



- 
General breathing exercises




|                                                                                     |                      |                                                                                     |                       |
|-------------------------------------------------------------------------------------|----------------------|-------------------------------------------------------------------------------------|-----------------------|
|  | General              |  | Alcohol               |
|  | Physical activity    |  | Text                  |
|  | Muscle strengthening |  | Question              |
|  | Nutrition            |  | Feedback on behaviour |
|  | Smoking              |  | Video                 |
